# Supplementary material for: Behavior of counterpoise correction in many‐body molecular clusters of organic compounds: Hartree–Fock interaction energy perspective
Source: PubMed Central journal article supplement (PMC9303541; doi:10.1002/jcc.26814), 2022-02-08
Supplement: JCC-43-568-s001.pdf [file JCC-43-568-s001.pdf]

Supplementary Information to accompany

# Behaviour of counterpoise correction in many-body molecular clusters of organic compounds: Hartree-Fock interaction energy perspective.

Anh Luu Phuong Nguyen, Ekaterina I. Izgorodina.

## Contents

|          |                                          |           |
|----------|------------------------------------------|-----------|
| <b>1</b> | <b>3B69 dataset</b>                      | <b>2</b>  |
| 1.1      | Structures . . . . .                     | 2         |
| 1.2      | Raw deviations . . . . .                 | 2         |
| <b>2</b> | <b>MBC-36 dataset</b>                    | <b>8</b>  |
| 2.1      | Structures . . . . .                     | 8         |
| 2.1.1    | Aspirin . . . . .                        | 9         |
| 2.1.2    | Benzene . . . . .                        | 9         |
| 2.1.3    | Oxalyl dihydrazide . . . . .             | 10        |
| 2.2      | Statistical errors . . . . .             | 12        |
| 2.3      | Raw deviations . . . . .                 | 16        |
| <b>3</b> | <b>CP correction with cut-off radius</b> | <b>18</b> |

# 1 3B69 dataset

## 1.1 Structures

**Table S1** Compound names included in the 3B69 dataset.

| Structure number | Name               |
|------------------|--------------------|
| 01               | Water              |
| 02               | Formaldehyde       |
| 03               | Methanol ethyne    |
| 04               | Acetonitrile       |
| 05               | Nitromethane       |
| 06               | Acetic acid        |
| 07               | Oxalic acid        |
| 08               | Vinylene carbonate |
| 09               | Acetamide          |
| 10               | Imidazole          |
| 11               | Isoxazole          |
| 12               | Pyrazole           |
| 13               | Triazine           |
| 14               | Cyanoacetamide     |
| 15               | Cyanoguanidine     |
| 16               | Triazolidinedione  |
| 17               | Oxazolidinone      |
| 18               | Succinic anhydride |
| 19               | Benzene            |
| 20               | Maleic acid        |
| 21               | p-Benzoquinone     |
| 22               | Uracil             |
| 23               | Cyclobutylfuran    |

Each structure has three different configurations, which are symbolised with a, b and c. For example, the corresponding complexes of water are labeled as 01a, 01b and 01c.

## 1.2 Raw deviations

**Table S2** Raw deviations (in  $\text{kJ}\cdot\text{mol}^{-1}$ ) of non-CP and CP-corrected HF/cc-pVDZ interaction energies of the 3B69 complexes. CP-corrected HF/cc-pVQZ interaction energies were used as the benchmark. The dispersion type shows the contribution of dispersion in the interaction energy: L = low, M = medium, H= high.

| Structure | Dispersion type | CP   | non-CP |
|-----------|-----------------|------|--------|
| 01a       | L               | 0.1  | 6.7    |
| 01b       | L               | -1.1 | 5.8    |
| 01c       | L               | 0.7  | 9.7    |
| 02a       | L               | -0.3 | 1.6    |
| 02b       | M               | -0.2 | 2.7    |
| 02c       | M               | -0.5 | 2.8    |
| 03a       | L               | 0.1  | 6.6    |
| 03b       | H               | -0.1 | 1.1    |

**Table S2 continued from previous page**

|     |   |      |     |
|-----|---|------|-----|
| 03c | M | -0.1 | 4.2 |
| 04a | M | -0.5 | 1.5 |
| 04b | L | -0.2 | 1.7 |
| 04c | L | -0.3 | 0.8 |
| 05a | M | 0.8  | 6   |
| 05b | M | 1.2  | 7   |
| 05c | L | 0.5  | 4.3 |
| 06a | L | -0.6 | 5.2 |
| 06b | L | -1   | 6.2 |
| 06c | H | -0.6 | 6.3 |
| 07a | M | 0.5  | 5.8 |
| 07b | L | 0.1  | 6   |
| 07c | L | 0.1  | 6   |
| 08a | L | 1.4  | 5.2 |
| 08b | M | 0.7  | 4.8 |
| 08c | L | 1.7  | 6.6 |
| 09a | H | -0.6 | 6.8 |
| 09b | L | -0.6 | 6.1 |
| 09c | L | -0.5 | 5.7 |
| 10a | M | 0.2  | 4.7 |
| 10b | M | 0    | 2.8 |
| 10c | L | 0.5  | 5.2 |
| 11a | H | 0.4  | 7.2 |
| 11b | M | 0.4  | 6.6 |
| 11c | L | 1    | 6   |
| 12a | L | 0.6  | 5.6 |
| 12b | H | 0    | 2.8 |
| 12c | L | 0.2  | 3.8 |
| 13b | H | 0.3  | 4.3 |
| 13c | H | 0    | 4.1 |
| 14a | M | -0.3 | 5.4 |
| 14b | H | -0.5 | 6.7 |
| 14c | L | -0.5 | 4.3 |
| 15a | L | 0.3  | 6.5 |
| 15b | H | -0.9 | 6.5 |
| 15c | M | -0.6 | 3.9 |
| 16a | M | 1.2  | 8.2 |
| 16b | L | -1.2 | 6.6 |
| 16c | M | 0.2  | 7.4 |
| 17a | L | -0.3 | 5.8 |
| 17b | M | -0.4 | 6.8 |
| 17c | L | -0.1 | 5.2 |
| 18a | M | 0.4  | 7   |
| 18b | H | -0.4 | 3.4 |
| 18c | M | 0.8  | 5.6 |
| 19a | H | 0.2  | 2.1 |
| 19b | H | 0.2  | 2.1 |
| 19c | H | 0.2  | 2   |
| 20a | L | -0.8 | 7.5 |

---

**Table S2 continued from previous page**

|     |   |      |     |
|-----|---|------|-----|
| 20b | L | -1.2 | 4   |
| 20c | M | 0.6  | 7.2 |
| 21a | H | -0.3 | 5.5 |
| 21b | H | 0.1  | 5.1 |
| 21c | H | -0.2 | 3.5 |
| 22a | H | -0.2 | 8   |
| 22b | M | 1    | 6.5 |
| 22c | M | 0.6  | 4.6 |
| 23a | H | 0.2  | 2.8 |
| 23b | H | 0.4  | 3.5 |
| 23c | H | -0.1 | 3.3 |

**Table S3** Raw deviations (in  $\text{kJ}\cdot\text{mol}^{-1}$ ) of non-CP and CP-corrected HF/cc-pVTZ interaction energies of the 3B69 complexes. CP-corrected HF/cc-pVQZ interaction energies were used as the benchmark. The dispersion type shows the contribution of dispersion in the interaction energy: L = low, M = medium, H= high.

| Structure | Dispersion type | CP   | non-CP |
|-----------|-----------------|------|--------|
| 01a       | L               | -0.1 | 2.5    |
| 01b       | L               | -0.4 | 2.3    |
| 01c       | L               | 0.2  | 3.5    |
| 02a       | L               | -0.1 | 0.6    |
| 02b       | M               | -0.1 | 0.9    |
| 02c       | M               | -0.1 | 1      |
| 03a       | L               | -0.2 | 2.1    |
| 03b       | H               | 0    | 0.6    |
| 03c       | M               | -0.2 | 1.6    |
| 04a       | M               | -0.1 | 0.6    |
| 04b       | L               | -0.1 | 0.6    |
| 04c       | L               | -0.1 | 0.4    |
| 05a       | M               | 0.2  | 2.2    |
| 05b       | M               | 0.2  | 2.6    |
| 05c       | L               | 0.1  | 1.9    |
| 06a       | L               | -0.2 | 1.9    |
| 06b       | L               | -0.2 | 2      |
| 06c       | H               | -0.2 | 2.3    |
| 07a       | M               | -0.1 | 2.2    |
| 07b       | L               | -0.1 | 1.7    |
| 07c       | L               | -0.1 | 1.8    |
| 08a       | L               | 0.3  | 1.5    |
| 08b       | M               | 0.2  | 1.8    |
| 08c       | L               | 0.2  | 1.8    |
| 09a       | H               | -0.2 | 2.4    |
| 09b       | L               | -0.3 | 2      |
| 09c       | L               | -0.2 | 1.9    |
| 10a       | M               | 0    | 1.7    |
| 10b       | M               | 0    | 1.5    |
| 10c       | L               | -0.1 | 1.7    |
| 11a       | H               | -0.1 | 2.6    |

**Table S3 continued from previous page**

|     |   |      |     |
|-----|---|------|-----|
| 11b | M | -0.1 | 2.1 |
| 11c | L | 0.1  | 1.7 |
| 12a | L | -0.1 | 1.9 |
| 12b | H | 0    | 1.3 |
| 12c | L | 0    | 1.5 |
| 13b | H | 0.1  | 1.5 |
| 13c | H | 0    | 1.5 |
| 14a | M | -0.1 | 2.2 |
| 14b | H | -0.2 | 2.4 |
| 14c | L | -0.1 | 1.5 |
| 15a | L | 0.1  | 2.3 |
| 15b | H | -0.3 | 2.5 |
| 15c | M | -0.1 | 2   |
| 16a | M | 0.2  | 2.9 |
| 16b | L | -0.4 | 2   |
| 16c | M | -0.1 | 2.5 |
| 17a | L | -0.3 | 1.7 |
| 17b | M | -0.2 | 2.6 |
| 17c | L | 0    | 2.1 |
| 18a | M | 0    | 2.4 |
| 18b | H | -0.1 | 1.3 |
| 18c | M | 0.1  | 1.9 |
| 19a | H | 0    | 0.8 |
| 19b | H | 0    | 0.8 |
| 19c | H | 0    | 0.8 |
| 20a | L | -0.2 | 3   |
| 20b | L | -0.3 | 1.3 |
| 20c | M | 0.1  | 3.2 |
| 21a | H | -0.1 | 2.1 |
| 21b | H | -0.2 | 1.6 |
| 21c | H | -0.1 | 1.6 |
| 22a | H | -0.3 | 2.1 |
| 22b | M | 0.2  | 2.7 |
| 22c | M | 0.1  | 1.8 |
| 23a | H | 0    | 1.2 |
| 23b | H | -0.1 | 1.1 |
| 23c | H | 0    | 1.5 |

**Table S4** Raw deviations (in  $\text{kJ}\cdot\text{mol}^{-1}$ ) of non-CP and CP-corrected HF/aug-cc-pVDZ interaction energies of the 3B69 complexes. CP-corrected HF/cc-pVQZ interaction energies were used as the benchmark. The dispersion type shows the contribution of dispersion in the interaction energy: L = low, M = medium, H= high.

| Structure | Dispersion type | CP   | non-CP |
|-----------|-----------------|------|--------|
| 01a       | L               | -0.3 | 0.5    |
| 01b       | L               | 0    | 1      |
| 01c       | L               | -0.4 | 0.7    |
| 02a       | L               | 0.1  | 0.5    |
| 02b       | M               | 0.1  | 0.8    |

**Table S4 continued from previous page**

|     |   |      |     |
|-----|---|------|-----|
| 02c | M | 0.1  | 0.9 |
| 03a | L | -0.5 | 0.6 |
| 03b | H | 0    | 0.6 |
| 03c | M | -0.2 | 0.6 |
| 04a | M | 0    | 0.9 |
| 04b | L | 0    | 0.9 |
| 04c | L | 0.1  | 0.7 |
| 05a | M | 0.1  | 1.7 |
| 05b | M | 0.1  | 1.8 |
| 05c | L | 0.1  | 1.3 |
| 06a | L | -0.3 | 1.2 |
| 06b | L | -0.6 | 1.1 |
| 06c | H | -0.2 | 1.8 |
| 07a | M | 0.1  | 2.5 |
| 07b | L | -0.4 | 1.9 |
| 07c | L | -0.3 | 2   |
| 08a | L | 0    | 1.5 |
| 08b | M | 0.1  | 2.4 |
| 08c | L | 0    | 2.1 |
| 09a | H | -0.2 | 1.7 |
| 09b | L | -0.1 | 1.4 |
| 09c | L | -0.2 | 1.3 |
| 10a | M | 0    | 1.8 |
| 10b | M | 0    | 1.5 |
| 10c | L | -0.1 | 1.1 |
| 11a | H | -0.6 | 2.7 |
| 11b | M | -0.7 | 1.3 |
| 11c | L | -0.7 | 1.1 |
| 12a | L | -0.3 | 1.9 |
| 12b | H | 0.1  | 2.1 |
| 12c | L | 0    | 1.6 |
| 13b | H | 0.1  | 1.1 |
| 13c | H | 0.1  | 1.5 |
| 14a | M | -0.1 | 2.1 |
| 14b | H | -0.2 | 1.9 |
| 14c | L | -0.1 | 1.7 |
| 15a | L | -0.4 | 1.7 |
| 15b | H | -0.1 | 2   |
| 15c | M | -0.2 | 1.1 |
| 16a | M | 0    | 3.8 |
| 16b | L | -0.5 | 2.2 |
| 16c | M | -0.2 | 2.9 |
| 17a | L | -0.1 | 1.7 |
| 17b | M | 0    | 2.6 |
| 17c | L | 0.1  | 2.4 |
| 18a | M | 0    | 2.5 |
| 18b | H | 0.1  | 1   |
| 18c | M | -0.1 | 2   |
| 19a | H | 0.1  | 3   |

---

**Table S4 continued from previous page**

|     |   |      |     |
|-----|---|------|-----|
| 19b | H | 0.1  | 3.1 |
| 19c | H | 0    | 3.2 |
| 20a | L | -0.4 | 3.2 |
| 20b | L | -0.9 | 0.8 |
| 20c | M | 0    | 4.5 |
| 21a | H | 0    | 3.6 |
| 21b | H | 0.2  | 2.2 |
| 21c | H | 0    | 2.8 |
| 22a | H | 0    | 2.9 |
| 22b | M | 0    | 4.8 |
| 22c | M | 0    | 2.9 |
| 23a | H | 0    | 3.3 |
| 23b | H | 0    | 2.2 |
| 23c | H | 0    | 2.8 |

**Table S5** Raw deviations (in  $\text{kJ}\cdot\text{mol}^{-1}$ ) of non-CP and CP-corrected HF/aug-cc-pVTZ interaction energies of the 3B69 complexes. CP-corrected HF/cc-pVQZ interaction energies were used as the benchmark. The dispersion type shows the contribution of dispersion in the interaction energy: L = low, M = medium, H= high.

| Structure | Dispersion type | CP   | non-CP |
|-----------|-----------------|------|--------|
| 01a       | L               | -0.1 | 0.2    |
| 01b       | L               | 0.2  | 0.5    |
| 01c       | L               | -0.3 | 0      |
| 02a       | L               | 0.1  | 0.2    |
| 02b       | M               | 0.1  | 0.3    |
| 02c       | M               | 0.1  | 0.3    |
| 03a       | L               | 0    | 0.3    |
| 03b       | H               | 0    | 0.2    |
| 03c       | M               | 0    | 0.2    |
| 04a       | M               | 0    | 0.3    |
| 04b       | L               | 0    | 0.3    |
| 04c       | L               | 0    | 0.3    |
| 05a       | M               | 0    | 0.5    |
| 05b       | M               | 0    | 0.6    |
| 05c       | L               | 0    | 0.4    |
| 06a       | L               | 0    | 0.5    |
| 06b       | L               | -0.1 | 0.6    |
| 06c       | H               | 0    | 0.7    |
| 07a       | M               | 0.2  | 1.1    |
| 07b       | L               | -0.2 | 0.6    |
| 07c       | L               | -0.1 | 0.7    |
| 08a       | L               | -0.1 | 0.4    |
| 08b       | M               | 0    | 0.8    |
| 08c       | L               | -0.1 | 0.6    |
| 09a       | H               | -0.1 | 0.6    |
| 09b       | L               | 0    | 0.5    |
| 09c       | L               | -0.1 | 0.4    |
| 10a       | M               | 0    | 0.6    |

**Table S5 continued from previous page**

|     |   |      |     |
|-----|---|------|-----|
| 10b | M | 0    | 0.4 |
| 10c | L | 0    | 0.5 |
| 11a | H | 0    | 1.1 |
| 11b | M | 0    | 0.8 |
| 11c | L | -0.1 | 0.6 |
| 12a | L | 0    | 0.6 |
| 12b | H | 0    | 0.5 |
| 12c | L | 0    | 0.4 |
| 13b | H | 0    | 0.4 |
| 13c | H | 0    | 0.5 |
| 14a | M | 0    | 0.8 |
| 14b | H | -0.1 | 0.7 |
| 14c | L | 0    | 0.7 |
| 15a | L | -0.2 | 0.5 |
| 15b | H | 0.2  | 0.9 |
| 15c | M | 0    | 0.5 |
| 16a | M | 0    | 1   |
| 16b | L | -0.1 | 0.8 |
| 16c | M | 0    | 0.9 |
| 17a | L | 0    | 0.6 |
| 17b | M | 0    | 0.7 |
| 17c | L | 0    | 0.6 |
| 18a | M | 0.1  | 0.9 |
| 18b | H | 0.1  | 0.4 |
| 18c | M | 0    | 0.8 |
| 19a | H | 0    | 0.5 |
| 19b | H | 0    | 0.5 |
| 19c | H | -0.1 | 0.5 |
| 20a | L | 0    | 1.1 |
| 20b | L | -0.1 | 0.6 |
| 20c | M | 0    | 1.2 |
| 21a | H | 0.1  | 1   |
| 21b | H | 0    | 0.6 |
| 21c | H | 0    | 0.8 |
| 22a | H | 0    | 0.9 |
| 22b | M | -0.1 | 1   |
| 22c | M | -0.1 | 0.7 |
| 23a | H | 0    | 0.8 |
| 23b | H | 0    | 0.6 |
| 23c | H | 0    | 0.7 |

---

## 2 MBC-36 dataset

### 2.1 Structures

The coordinate files (\*.xyz) of the MBC-36 complexes are available in the following Github repository:  
<https://github.com/nlp-anh/CP-correction.git>



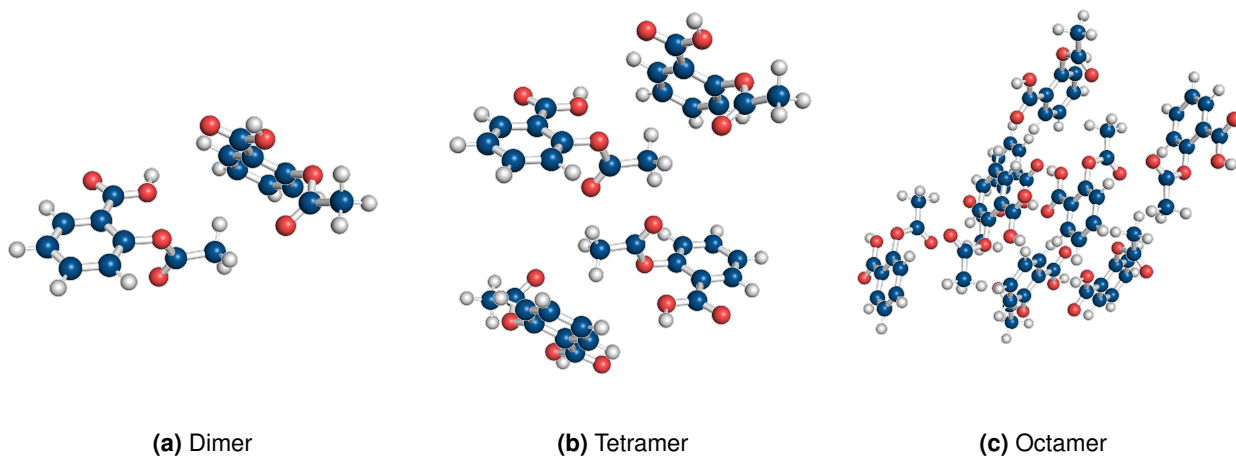

**Figure S1** Clusters of form I of Aspirin.

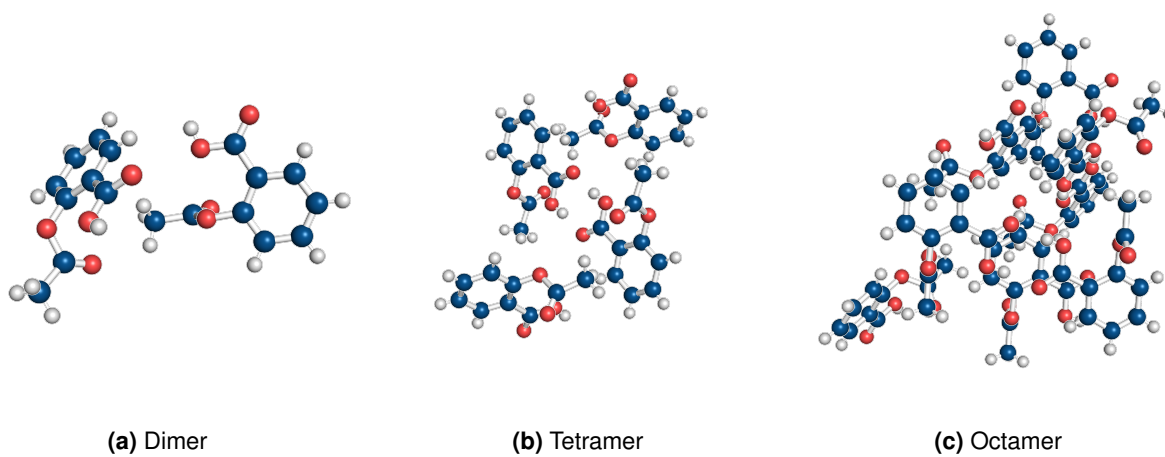

**Figure S2** Clusters of form II of Aspirin.

### 2.1.1 Aspirin

### 2.1.2 Benzene

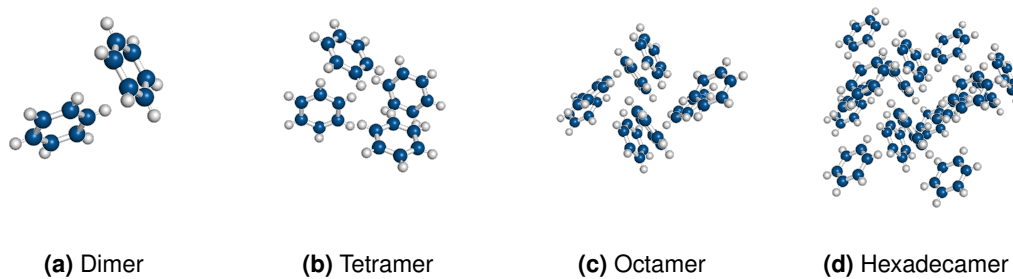

**Figure S3** Clusters of form I of Benzene.

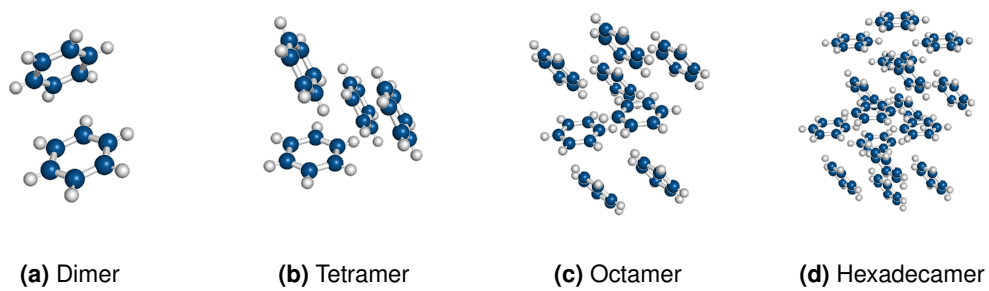

**Figure S4** Clusters of form II of Benzene.

### 2.1.3 Oxalyl dihydrazide

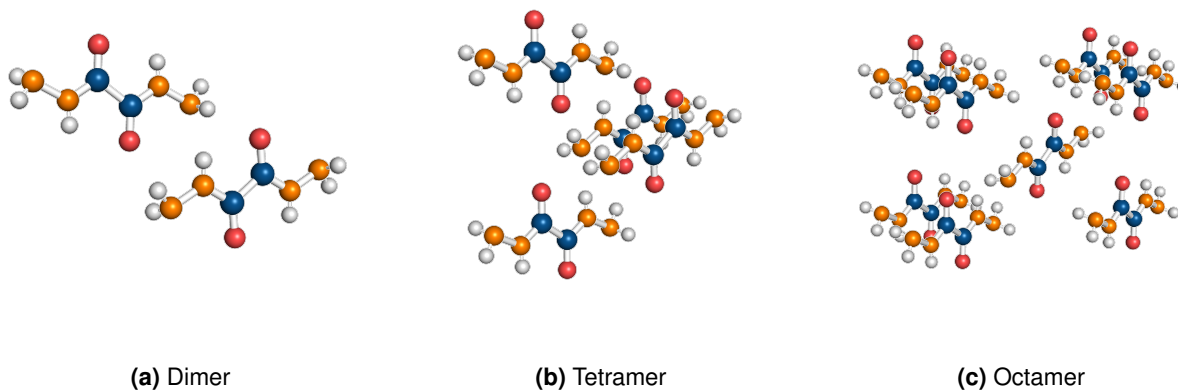

**Figure S5** Clusters of form  $\alpha$  of Oxalyl Dihydrazide.

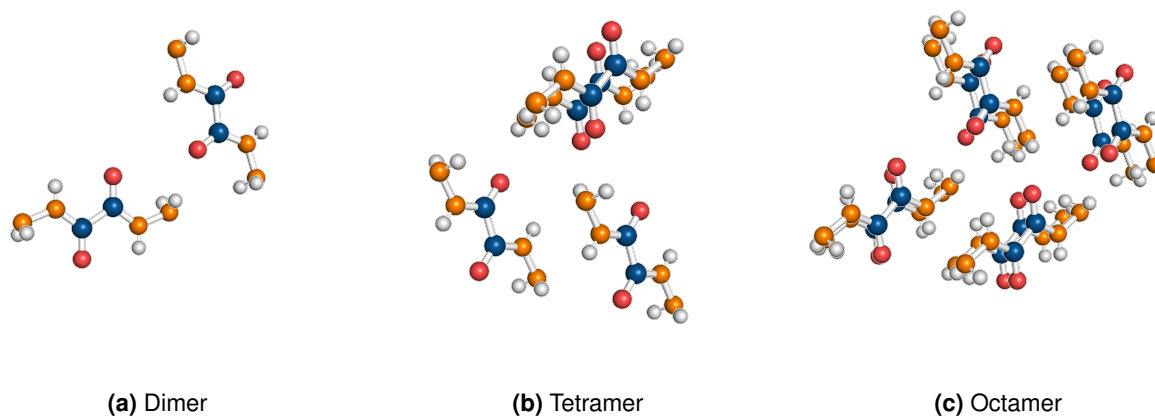

**Figure S6** Clusters of form  $\beta$  of Oxalyl Dihydrazide.

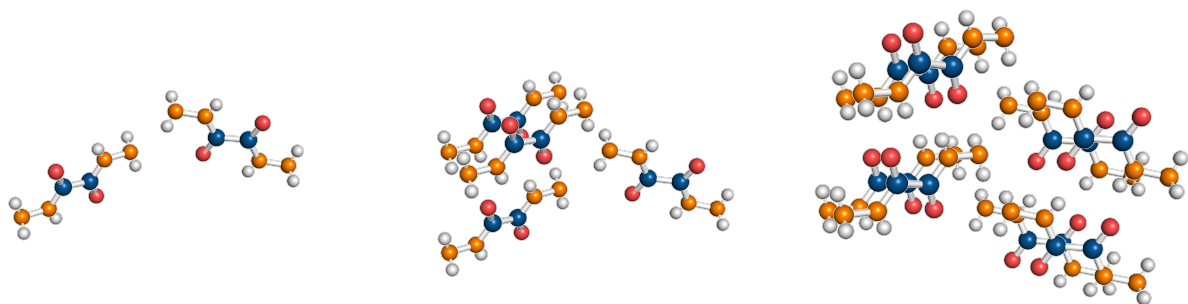

(a) Dimer

(b) Tetramer

(c) Octamer

**Figure S7** Clusters of form  $\delta$  of Oxalyl Dihydrazide.

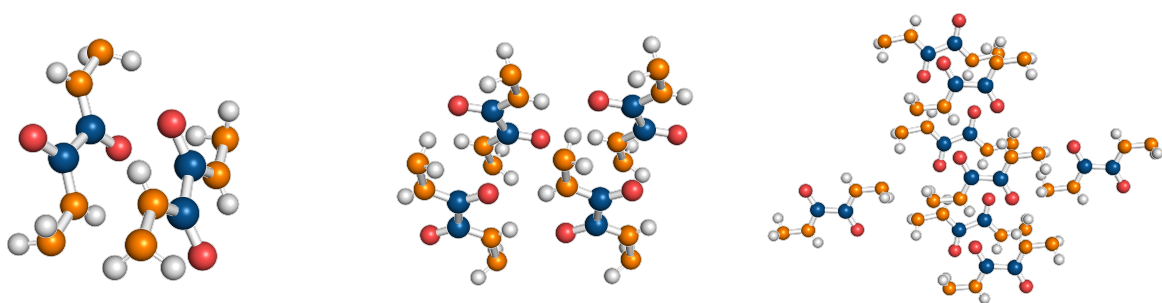

(a) Dimer.

(b) Tetramer.

(c) Octamer.

**Figure S8** Clusters of form  $\gamma$  of Oxalyl Dihydrazide.

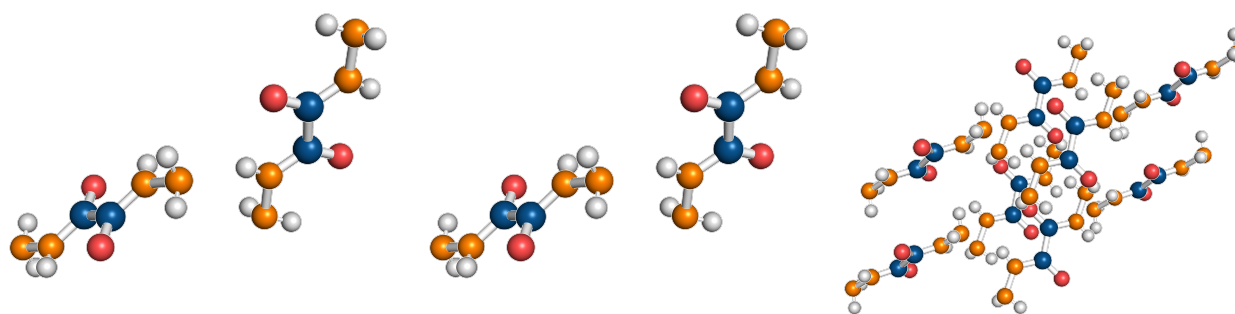

(a) Dimer

(b) Tetramer

(c) Octamer

**Figure S9** Clusters of form  $\epsilon$  of Oxalyl Dihydrazide.

## 2.2 Statistical errors

**Table S6** Root mean square deviations (RMSD), mean unsigned errors (MUEs) and absolute maximum deviations (Max) (in  $\text{kJ}\cdot\text{mol}^{-1}$ ) for non-CP and CP-corrected HF/cc-pVDZ interaction energies of benzene clusters. All energies were calculated per molecule. CP-corrected HF/cc-pVQZ were taken as the benchmark.

| $\Delta E^{INT}$ | Cluster size | RMSD | MUE | Max |
|------------------|--------------|------|-----|-----|
| CP               | 2            | 0.2  | 0.2 | 0.2 |
|                  | 4            | 0.1  | 0.1 | 0.1 |
|                  | 8            | 0.1  | 0.1 | 0.2 |
|                  | 16           | 0.2  | 0.1 | 0.2 |
| non-CP           | 2            | 1.5  | 1.5 | 1.6 |
|                  | 4            | 3.1  | 3.1 | 3.3 |
|                  | 8            | 4.5  | 4.5 | 4.7 |
|                  | 16           | 5.8  | 5.8 | 6.5 |

**Table S7** Root mean square deviations (RMSD), mean unsigned errors (MUEs) and absolute maximum deviations (Max) (in  $\text{kJ}\cdot\text{mol}^{-1}$ ) for non-CP and CP-corrected HF/cc-pVDZ interaction energies of aspirin clusters. All energies were calculated per molecule. CP-corrected HF/cc-pVQZ were taken as the benchmark.

| $\Delta E^{INT}$ | Cluster size | RMSD | MUE  | Max |
|------------------|--------------|------|------|-----|
| CP               | 2            | 0.1  | 0.1  | 0.1 |
|                  | 4            | 0.3  | 0.2  | 0.4 |
|                  | 8            | 0.6  | 0.6  | 0.6 |
| non-CP           | 2            | 3.4  | 3.4  | 3.6 |
|                  | 4            | 5.6  | 5.5  | 6.0 |
|                  | 8            | 12.3 | 12.3 | 13  |

**Table S8** Root mean square deviations (RMSD), mean unsigned errors (MUEs) and absolute maximum deviations (Max) (in  $\text{kJ}\cdot\text{mol}^{-1}$ ) for non-CP and CP-corrected HF/cc-pVDZ interaction energies of oxalyl dihydrazide clusters. All energies were calculated per molecule. CP-corrected HF/cc-pVQZ were taken as the benchmark.

| $\Delta E^{INT}$ | Cluster size | RMSD | MUE  | Max  |
|------------------|--------------|------|------|------|
| CP               | 2            | 0.1  | 0.1  | 0.2  |
|                  | 2            | 4.7  | 4.4  | 7.4  |
|                  | 4            | 0.1  | 0.1  | 0.2  |
| non-CP           | 4            | 11.7 | 11.6 | 13.6 |
|                  | 8            | 0.4  | 0.3  | 0.6  |
|                  | 8            | 17.0 | 16.8 | 19.8 |

**Table S9** Root mean square deviations (RMSD), mean unsigned errors (MUEs) and absolute maximum deviations (Max) (in  $\text{kJ}\cdot\text{mol}^{-1}$ ) for non-CP and CP-corrected HF/cc-pVTZ interaction energies of benzene clusters. All energies were calculated per molecule. CP-corrected HF/cc-pVQZ were taken as the benchmark.

| $\Delta E^{INT}$ | Cluster size | RMSD | MUE | Max |
|------------------|--------------|------|-----|-----|
| CP               | 2            | 0.0  | 0.0 | 0.0 |
|                  | 4            | 0.0  | 0.0 | 0.0 |
|                  | 8            | 0.0  | 0.0 | 0.0 |
|                  | 16           | 0.0  | 0.0 | 0.1 |
| non-CP           | 2            | 0.6  | 0.6 | 0.6 |
|                  | 4            | 1.2  | 1.2 | 1.3 |
|                  | 8            | 1.7  | 1.7 | 1.8 |
|                  | 16           | 2.2  | 2.2 | 2.4 |

**Table S10** Root mean square deviations (RMSD), mean unsigned errors (MUEs) and absolute maximum deviations (Max) (in  $\text{kJ}\cdot\text{mol}^{-1}$ ) for non-CP and CP-corrected HF/cc-pVTZ interaction energies of aspirin clusters. All energies were calculated per molecule. CP-corrected HF/cc-pVQZ were taken as the benchmark.

| $\Delta E^{INT}$ | Cluster size | RMSD | MUE | Max |
|------------------|--------------|------|-----|-----|
| CP               | 2            | 0.0  | 0.0 | 0.0 |
|                  | 4            | 0.1  | 0.1 | 0.1 |
|                  | 8            | 0.1  | 0.1 | 0.2 |
| non-CP           | 2            | 1.3  | 1.3 | 1.4 |
|                  | 4            | 1.9  | 1.9 | 2.0 |
|                  | 8            | 4.3  | 4.3 | 4.5 |

**Table S11** Root mean square deviations (RMSD), mean unsigned errors (MUEs) and absolute maximum deviations (Max) (in  $\text{kJ}\cdot\text{mol}^{-1}$ ) for non-CP and CP-corrected HF/cc-pVTZ interaction energies of oxalyl dihydrazide clusters. All energies were calculated per molecule. CP-corrected HF/cc-pVQZ were taken as the benchmark.

| $\Delta E^{INT}$ | Cluster size | RMSD | MUE | Max |
|------------------|--------------|------|-----|-----|
| CP               | 2            | 0.1  | 0.1 | 0.1 |
|                  | 4            | 0.2  | 0.2 | 0.3 |
|                  | 8            | 0.2  | 0.2 | 0.3 |
| non-CP           | 2            | 1.9  | 1.8 | 3.0 |
|                  | 4            | 4.4  | 4.4 | 4.9 |
|                  | 8            | 6.2  | 6.2 | 7.2 |

**Table S12** Root mean square deviations (RMSD), mean unsigned errors (MUEs) and absolute maximum deviations (Max) (in  $\text{kJ}\cdot\text{mol}^{-1}$ ) for non-CP and CP-corrected HF/aug-cc-pVDZ interaction energies of benzene clusters. All energies were calculated per molecule. CP-corrected HF/cc-pVQZ were taken as the benchmark.

| $\Delta E^{INT}$ | Cluster size | RMSD | MUE  | Max  |
|------------------|--------------|------|------|------|
| CP               | 2            | 0.0  | 0.0  | 0.0  |
|                  | 4            | 0.1  | 0.1  | 0.1  |
|                  | 8            | 0.1  | 0.1  | 0.1  |
|                  | 16           | 0.1  | 0.1  | 0.1  |
| non-CP           | 2            | 2.8  | 2.8  | 2.9  |
|                  | 4            | 5.5  | 5.5  | 5.8  |
|                  | 8            | 8.7  | 8.7  | 8.9  |
|                  | 16           | 12.2 | 12.2 | 13.3 |

**Table S13** Root mean square deviations (RMSD), mean unsigned errors (MUEs) and absolute maximum deviations (Max) (in  $\text{kJ}\cdot\text{mol}^{-1}$ ) for non-CP and CP-corrected HF/aug-cc-pVDZ interaction energies of aspirin clusters. All energies were calculated per molecule. CP-corrected HF/cc-pVQZ were taken as the benchmark.

| $\Delta E^{INT}$ | Cluster size | RMSD | MUE  | Max  |
|------------------|--------------|------|------|------|
| CP               | 2            | 0.0  | 0.0  | 0.0  |
|                  | 4            | 0.1  | 0.1  | 0.2  |
|                  | 8            | 0.2  | 0.2  | 0.2  |
| non-CP           | 2            | 3.3  | 3.2  | 3.4  |
|                  | 4            | 4.4  | 4.4  | 4.7  |
|                  | 8            | 11.2 | 11.1 | 12.6 |

**Table S14** Root mean square deviations (RMSD), mean unsigned errors (MUEs) and absolute maximum deviations (Max) (in  $\text{kJ}\cdot\text{mol}^{-1}$ ) for non-CP and CP-corrected HF/aug-cc-pVDZ interaction energies of oxalyl dihydrazide clusters. All energies were calculated per molecule. CP-corrected HF/cc-pVQZ were taken as the benchmark.

| $\Delta E^{INT}$ | Cluster size | RMSD | MUE | Max |
|------------------|--------------|------|-----|-----|
| CP               | 2            | 0.0  | 0.0 | 0.1 |
|                  | 4            | 0.1  | 0.1 | 0.2 |
|                  | 8            | 0.1  | 0.1 | 0.2 |
| non-CP           | 2            | 2.0  | 1.8 | 3.2 |
|                  | 4            | 5.2  | 5.1 | 6.1 |
|                  | 8            | 8.1  | 8.0 | 9.0 |

**Table S15** Root mean square deviations (RMSD), mean unsigned errors (MUEs) and absolute maximum deviations (Max) (in  $\text{kJ}\cdot\text{mol}^{-1}$ ) for non-CP and CP-corrected HF/aug-cc-pVTZ interaction energies of benzene clusters. All energies were calculated per molecule. CP-corrected HF/cc-pVQZ were taken as the benchmark.

| $\Delta E^{INT}$ | Cluster size | RMSD | MUE | Max |
|------------------|--------------|------|-----|-----|
| CP               | 2            | 0.0  | 0.0 | 0.0 |
|                  | 4            | 0.0  | 0.0 | 0.0 |
|                  | 8            | 0.0  | 0.0 | 0.0 |
|                  | 16           | 0.0  | 0.0 | 0.0 |
| non-CP           | 2            | 0.3  | 0.3 | 0.4 |
|                  | 4            | 0.6  | 0.6 | 0.6 |
|                  | 8            | 0.9  | 0.9 | 1.0 |
|                  | 16           | 1.2  | 1.2 | 1.4 |

**Table S16** Root mean square deviations (RMSD), mean unsigned errors (MUEs) and absolute maximum deviations (Max) (in  $\text{kJ}\cdot\text{mol}^{-1}$ ) for non-CP and CP-corrected HF/aug-cc-pVTZ interaction energies of aspirin clusters. All energies were calculated per molecule. CP-corrected HF/cc-pVQZ were taken as the benchmark.

| $\Delta E^{INT}$ | Cluster size | RMSD | MUE | Max |
|------------------|--------------|------|-----|-----|
| CP               | 2            | 0.0  | 0.0 | 0.0 |
|                  | 4            | 0.0  | 0.0 | 0.0 |
|                  | 8            | 0.0  | 0.0 | 0.0 |
| non-CP           | 2            | 0.8  | 0.8 | 0.8 |
|                  | 4            | 1.1  | 1.1 | 1.2 |
|                  | 8            | 2.4  | 2.4 | 2.5 |

**Table S17** Root mean square deviations (RMSD), mean unsigned errors (MUEs) and absolute maximum deviations (Max) (in  $\text{kJ}\cdot\text{mol}^{-1}$ ) for non-CP and CP-corrected HF/aug-cc-pVTZ interaction energies of oxalyl dihydrazide clusters. All energies were calculated per molecule. CP-corrected HF/cc-pVQZ were taken as the benchmark.

| $\Delta E^{INT}$ | Cluster size | RMSD | MUE | Max |
|------------------|--------------|------|-----|-----|
| CP               | 2            | 0.0  | 0.0 | 0.0 |
|                  | 4            | 0.1  | 0.0 | 0.1 |
|                  | 8            | 0.1  | 0.0 | 0.1 |
| non-CP           | 2            | 0.5  | 0.5 | 0.8 |
|                  | 4            | 1.5  | 1.4 | 1.9 |
|                  | 8            | 2.1  | 2.1 | 2.4 |

## 2.3 Raw deviations

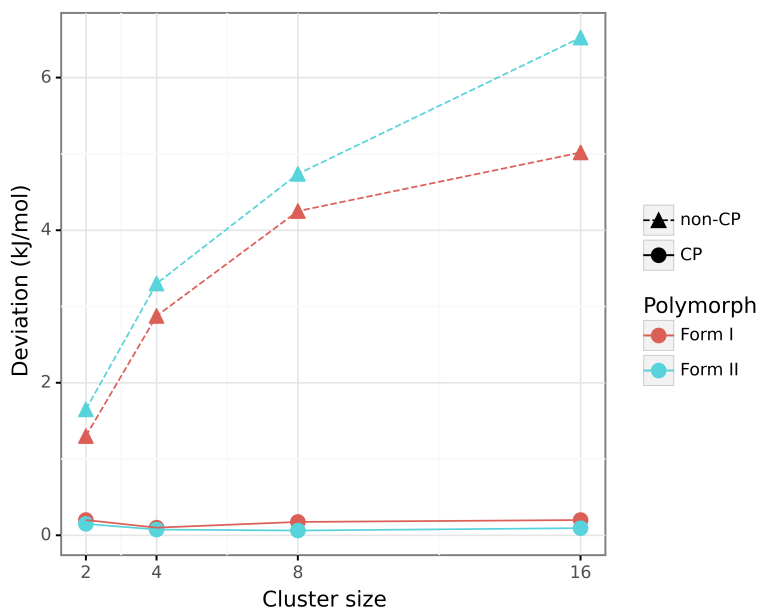

**Figure S10** Behaviour of raw deviations (in  $\text{kJ}\cdot\text{mol}^{-1}$ ) of non-CP and CP-corrected HF/cc-pVDZ interaction energies with increasing cluster size for benzene clusters. CP-corrected HF/cc-pVQZ interaction energies were used as the benchmark.

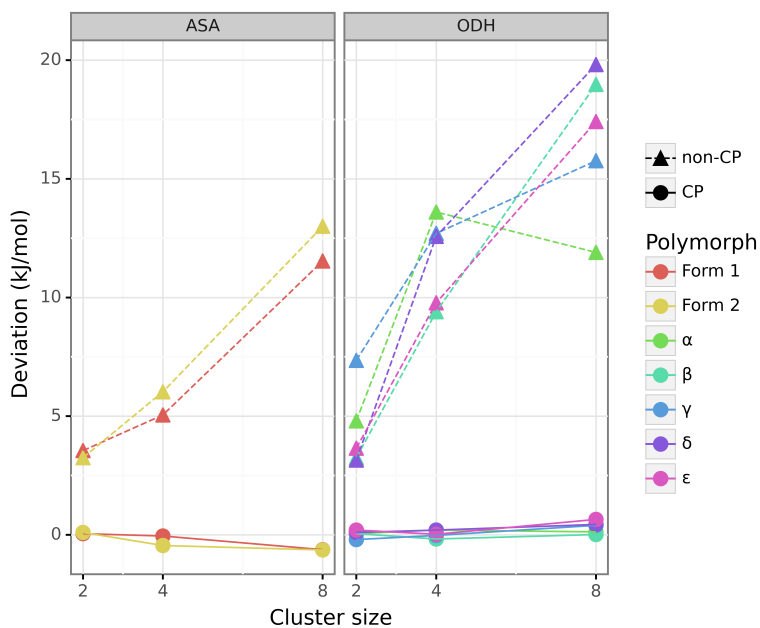

**Figure S11** Behaviour of raw deviations (in  $\text{kJ}\cdot\text{mol}^{-1}$ ) of non-CP and CP-corrected HF/cc-pVDZ interaction energies with increasing cluster size for aspirin and oxalyl dihydrazide clusters. CP-corrected HF/cc-pVQZ interaction energies were used as the benchmark.



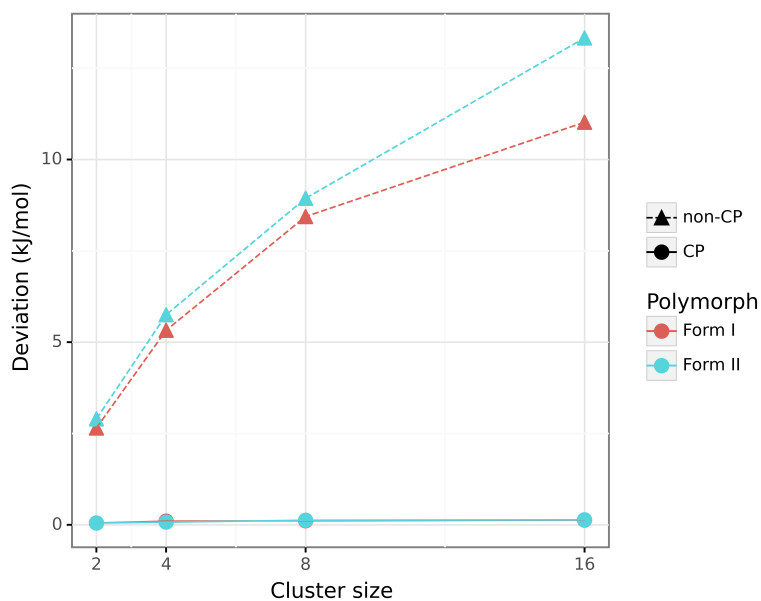

**Figure S12** Behaviour of raw deviations (in  $\text{kJ}\cdot\text{mol}^{-1}$ ) of non-CP and CP-corrected HF/aug-cc-pVDZ interaction energies with increasing cluster size for benzene clusters. CP-corrected HF/cc-pVQZ interaction energies were used as the benchmark.

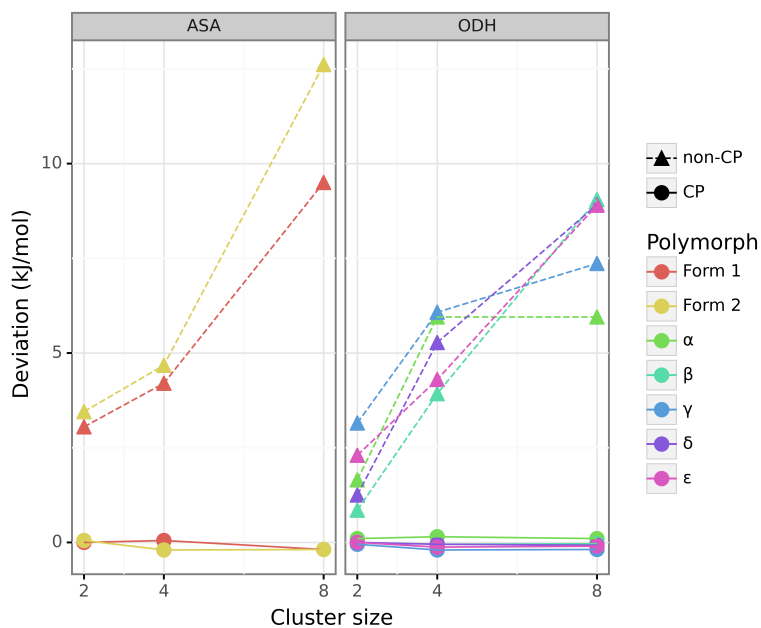

**Figure S13** Behaviour of raw deviations (in  $\text{kJ}\cdot\text{mol}^{-1}$ ) of non-CP and CP-corrected HF/aug-cc-pVDZ interaction energies with increasing cluster size for aspirin and oxalyl dihydrazide clusters. CP-corrected HF/cc-pVQZ interaction energies were used as the benchmark.

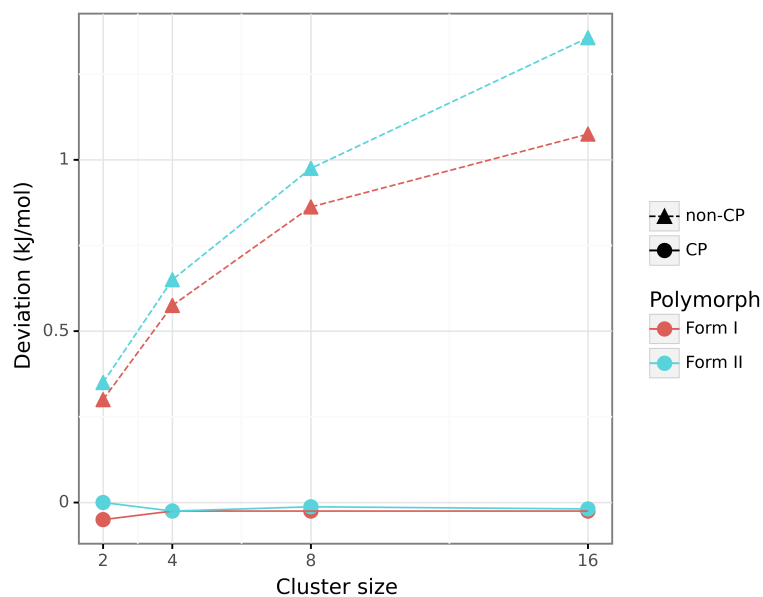

**Figure S14** Behaviour of raw deviations (in  $\text{kJ}\cdot\text{mol}^{-1}$ ) of non-CP and CP-corrected HF/aug-cc-pVTZ interaction energies with increasing cluster size for benzene clusters. CP-corrected HF/cc-pVQZ interaction energies were used as the benchmark.

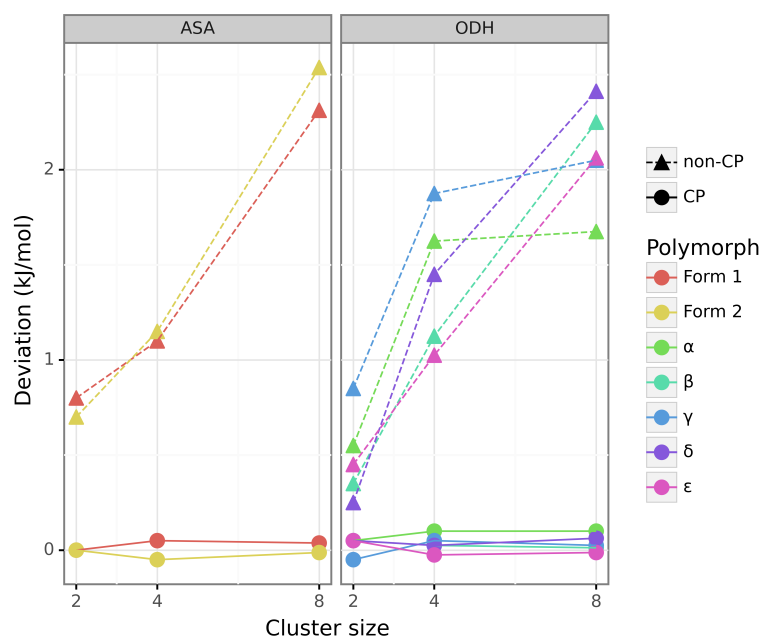

**Figure S15** Behaviour of raw deviations (in  $\text{kJ}\cdot\text{mol}^{-1}$ ) of non-CP and CP-corrected HF/aug-cc-pVTZ interaction energies with increasing cluster size for aspirin and oxalyl dihydrazide clusters. CP-corrected HF/cc-pVQZ interaction energies were used as the benchmark.

### 3 CP correction with cut-off radius

**Table S18** CP-corrected HF/cc-pVDZ energies of individual molecules in the 16-molecule benzene cluster (in Eh). The energies were calculated using the ghost molecules from the full system, from a sphere of 10 Å, 8 Å and 6 Å.

| Molecule | Full         | 10 Å         | 8 Å          | 6 Å        |
|----------|--------------|--------------|--------------|------------|
| 1        | -230.585749  | -230.5857461 | -230.5857426 | -230.58537 |
| 2        | -230.586327  | -230.5863267 | -230.586323  | -230.58599 |
| 3        | -230.585740  | -230.5857374 | -230.5857347 | -230.58555 |
| 4        | -230.585925  | -230.5859242 | -230.5859204 | -230.58576 |
| 5        | -230.585925  | -230.5859245 | -230.5859204 | -230.58576 |
| 6        | -230.586056  | -230.5860529 | -230.5860501 | -230.58555 |
| 7        | -230.586506  | -230.5865051 | -230.5865008 | -230.58617 |
| 8        | -230.586450  | -230.586447  | -230.5864435 | -230.58595 |
| 9        | -230.587603  | -230.5876021 | -230.5876007 | -230.58723 |
| 10       | -230.587610  | -230.5876087 | -230.5876073 | -230.58723 |
| 11       | -230.586358  | -230.5863572 | -230.5863547 | -230.58603 |
| 12       | -230.587571  | -230.5875705 | -230.5875664 | -230.58719 |
| 13       | -230.587894  | -230.5878944 | -230.5878924 | -230.58737 |
| 14       | -230.587346  | -230.5873454 | -230.5873382 | -230.58641 |
| 15       | -230.5873549 | -230.5873549 | -230.5873472 | -230.58641 |
| 16       | -230.586438  | -230.5864374 | -230.5864329 | -230.58599 |

**Table S19** CP-corrected HF/cc-pVTZ energies of individual molecules in the 16-molecule benzene cluster (in Eh). The energies were calculated using the ghost molecules from the full system, from a sphere of 10 Å, 8 Å and 6 Å.

| Molecule | Full         | 10 Å         | 8 Å          | 6 Å        |
|----------|--------------|--------------|--------------|------------|
| 1        | -230.663042  | -230.6630396 | -230.6630362 | -230.66289 |
| 2        | -230.663222  | -230.6632212 | -230.6632172 | -230.66309 |
| 3        | -230.663054  | -230.6630517 | -230.6630486 | -230.66293 |
| 4        | -230.663092  | -230.6630897 | -230.6630866 | -230.66299 |
| 5        | -230.663092  | -230.6630901 | -230.6630866 | -230.66299 |
| 6        | -230.663163  | -230.6631611 | -230.6631582 | -230.66293 |
| 7        | -230.663311  | -230.6633096 | -230.6633052 | -230.66318 |
| 8        | -230.663285  | -230.6632835 | -230.6632806 | -230.66309 |
| 9        | -230.663701  | -230.6636999 | -230.6636989 | -230.6636  |
| 10       | -230.663708  | -230.6637075 | -230.6637065 | -230.6636  |
| 11       | -230.663259  | -230.6632584 | -230.6632564 | -230.66316 |
| 12       | -230.663654  | -230.6636541 | -230.6636519 | -230.66355 |
| 13       | -230.663785  | -230.6637854 | -230.6637834 | -230.66363 |
| 14       | -230.663594  | -230.6635938 | -230.6635887 | -230.66325 |
| 15       | -230.6636045 | -230.6636045 | -230.6635992 | -230.66325 |
| 16       | -230.663263  | -230.6632619 | -230.6632559 | -230.66309 |

**Table S20** CP-corrected energies of individual molecules in the  $2 \times 2 \times 2$  supercells of form I of benzene calculated with cc-pVDZ and cc-pVTZ benzene cluster (in Eh). The energies were calculated using the ghost molecules from the sphere of 10 Å around each corresponding molecule.

| Molecule | cc-pVDZ    | cc-pVTZ    |
|----------|------------|------------|
| 1        | -230.58575 | -230.66304 |
| 2        | -230.5868  | -230.66344 |
| 3        | -230.58633 | -230.66322 |
| 4        | -230.58638 | -230.66327 |
| 5        | -230.5876  | -230.66368 |
| 6        | -230.58669 | -230.66335 |
| 7        | -230.58574 | -230.66305 |
| 8        | -230.5866  | -230.66336 |
| 9        | -230.58592 | -230.66309 |
| 10       | -230.58646 | -230.6633  |
| 11       | -230.58766 | -230.66375 |
| 12       | -230.58667 | -230.6634  |
| 13       | -230.58737 | -230.66361 |
| 14       | -230.58869 | -230.66402 |
| 15       | -230.58737 | -230.66361 |
| 16       | -230.58667 | -230.6634  |
| 17       | -230.58766 | -230.66375 |
| 18       | -230.58646 | -230.6633  |
| 19       | -230.58592 | -230.66309 |
| 20       | -230.5866  | -230.66336 |
| 21       | -230.58574 | -230.66305 |
| 22       | -230.58669 | -230.66335 |
| 23       | -230.5876  | -230.66368 |
| 24       | -230.58638 | -230.66327 |
| 25       | -230.58633 | -230.66322 |
| 26       | -230.5868  | -230.66344 |
| 27       | -230.58575 | -230.66304 |
| 28       | -230.58763 | -230.66372 |
| 29       | -230.58763 | -230.66372 |
| 30       | -230.58866 | -230.664   |
| 31       | -230.58866 | -230.664   |
| 32       | -230.58764 | -230.66373 |
| 33       | -230.58763 | -230.66373 |
| 34       | -230.58763 | -230.66373 |
| 35       | -230.58764 | -230.66373 |
| 36       | -230.58866 | -230.664   |
| 37       | -230.58866 | -230.664   |
| 38       | -230.58763 | -230.66372 |
| 39       | -230.58763 | -230.66372 |
| 40       | -230.58758 | -230.66367 |
| 41       | -230.58759 | -230.66367 |
| 42       | -230.58758 | -230.66367 |
| 43       | -230.58759 | -230.66367 |
| 44       | -230.58867 | -230.66401 |

**Table S20** CP-corrected energies of individual molecules in the  $2 \times 2 \times 2$  supercells of form I of benzene calculated with cc-pVDZ and cc-pVTZ benzene cluster (in Eh). The energies were calculated using the ghost molecules from the sphere of 10 Å around each corresponding molecule.

| Molecule | cc-pVDZ    | cc-pVTZ    |
|----------|------------|------------|
| 45       | -230.58867 | -230.66401 |
| 46       | -230.58867 | -230.66401 |
| 47       | -230.58867 | -230.66401 |
| 48       | -230.58759 | -230.66367 |
| 49       | -230.58758 | -230.66367 |
| 50       | -230.58759 | -230.66367 |
| 51       | -230.58758 | -230.66367 |
| 52       | -230.58735 | -230.6636  |
| 53       | -230.58868 | -230.66401 |
| 54       | -230.58736 | -230.66361 |
| 55       | -230.58735 | -230.6636  |
| 56       | -230.58868 | -230.66401 |
| 57       | -230.58736 | -230.66361 |
| 58       | -230.58736 | -230.66361 |
| 59       | -230.58868 | -230.66401 |
| 60       | -230.58735 | -230.6636  |
| 61       | -230.58736 | -230.66361 |
| 62       | -230.58868 | -230.66401 |
| 63       | -230.58735 | -230.6636  |

**Table S21** CP-corrected energies of individual molecules in the  $2 \times 2 \times 2$  supercells of form II of benzene calculated with cc-pVDZ and cc-pVTZ benzene cluster (in Eh). The energies were calculated using the ghost molecules from the sphere of 10 Å around each corresponding molecule.

| Molecule | cc-pVDZ    | cc-pVTZ    |
|----------|------------|------------|
| 1        | -230.58959 | -230.66554 |
| 2        | -230.59019 | -230.66576 |
| 3        | -230.58962 | -230.66553 |
| 4        | -230.59093 | -230.66596 |
| 5        | -230.59181 | -230.66626 |
| 6        | -230.59049 | -230.66584 |
| 7        | -230.58994 | -230.66565 |
| 8        | -230.59025 | -230.66577 |
| 9        | -230.58943 | -230.66548 |
| 10       | -230.59014 | -230.66573 |
| 11       | -230.59092 | -230.66598 |
| 12       | -230.59041 | -230.6658  |
| 13       | -230.59139 | -230.66609 |
| 14       | -230.59263 | -230.66643 |
| 15       | -230.59139 | -230.66609 |
| 16       | -230.59041 | -230.66581 |
| 17       | -230.59092 | -230.66598 |
| 18       | -230.59014 | -230.66573 |

**Table S21** CP-corrected energies of individual molecules in the  $2 \times 2 \times 2$  supercells of form II of benzene calculated with cc-pVDZ and cc-pVTZ benzene cluster (in Eh). The energies were calculated using the ghost molecules from the sphere of 10 Å around each corresponding molecule.

| Molecule | cc-pVDZ    | cc-pVTZ    |
|----------|------------|------------|
| 19       | -230.58943 | -230.66548 |
| 20       | -230.59025 | -230.66577 |
| 21       | -230.58994 | -230.66565 |
| 22       | -230.59049 | -230.66584 |
| 23       | -230.59181 | -230.66626 |
| 24       | -230.59093 | -230.66596 |
| 25       | -230.58962 | -230.66553 |
| 26       | -230.59019 | -230.66576 |
| 27       | -230.58959 | -230.66554 |
| 28       | -230.59144 | -230.66616 |
| 29       | -230.59144 | -230.66616 |
| 30       | -230.59142 | -230.66616 |
| 31       | -230.5914  | -230.66615 |
| 32       | -230.59227 | -230.66636 |
| 33       | -230.59228 | -230.66636 |
| 34       | -230.59228 | -230.66636 |
| 35       | -230.59227 | -230.66636 |
| 36       | -230.5914  | -230.66615 |
| 37       | -230.59141 | -230.66616 |
| 38       | -230.59144 | -230.66616 |
| 39       | -230.59144 | -230.66616 |
